# Supplementary material
Source: ML conference proceedings conference paper supplement (https://proceedings.neurips.cc/paper_files/paper/2019/hash/4cb811134b9d39fc3104bd06ce75abad-Abstract.html)
Supplement: Supplementary file [file 4cb811134b9d39fc3104bd06ce75abad-Supplemental.zip]

---

# A Prior of a Googol Gaussians: a Tensor Ring Induced Prior for Generative Models (Supplementary)

---

Maksim Kuznetsov<sup>1,\*</sup>   Daniil Polykovskiy<sup>1,\*</sup>   Dmitry Vetrov<sup>2</sup>   Alexander Zhebrak<sup>1</sup>

<sup>1</sup>Insilico Medicine   <sup>2</sup>National Research University Higher School of Economics  
 {kuznetsov,daniil,zhebrak}@insilico.com   vetrovd@yandex.ru

## 1 Derivations for one-dimensional conditional distributions

In the paper, we stated that one-dimensional conditional distributions are Gaussian Mixture Models with the same means and variances as priors, but with different weights  $p_\psi(s_k \mid z_{1:k-1})$ . With Tensor Ring decomposition, we can efficiently compute those weights (we denote  $\prod_{j=k+1}^d \tilde{Q}_j$  as  $\tilde{Q}_{k+1:d}$ ):

$$\begin{aligned}
 p_\psi(s_k \mid z_{1:k-1}) &\propto p_\psi(s_k, z_{1:k-1}) \\
 &= \sum_{s_{1:k-1}} p_\psi(s_{1:k-1}, s_k, z_{1:k-1}) \\
 &= \sum_{s_{1:k-1}} p_\psi(s_{1:k}) p_\psi(z_{1:k-1} \mid s_{1:k-1}) \\
 &\propto \sum_{s_{1:k-1}} \text{Tr} \left( \prod_{j=1}^{k-1} Q_j[s_j] Q_k[s_k] \tilde{Q}_{k+1:d} \right) \prod_{j=1}^{k-1} p_\psi(z_j \mid s_j) \\
 &= \text{Tr} \left( \sum_{s_{1:k-1}} \prod_{j=1}^{k-1} [Q_j[s_j] p_\psi(z_j \mid s_j)] \cdot Q_k[s_k] \tilde{Q}_{k+1:d} \right) \\
 &= \text{Tr} \left( \prod_{j=1}^{k-1} \left( \sum_{s_j} Q_j[s_j] p_\psi(z_j \mid s_j) \right) \cdot Q_k[s_k] \tilde{Q}_{k+1:d} \right)
 \end{aligned} \tag{1}$$

## 2 Calculation of marginal probabilities in Tensor Ring

In Algorithm 1 we show how to compute marginal probabilities for a distribution parameterized in Tensor Ring format. Note that we compute a normalizing constant on-the-fly.

## 3 Model architecture

We manually tuned the hyperparameters: first we selected the best encoder-decoder architecture for a Gaussian prior and then tuned TRIP parameters for a fixed architecture. For models from a GAN family, we used a deconvolutional generator with kernel size  $5 \times 5$  and ReLU activations. The number of channels in layers was  $[512, 256, 128, 64, 3]$ . For the discriminator, we used the symmetric convolutional architecture with a LeakyReLU. We trained a model using Adam [1]

---

\*equal contribution

---

**Algorithm 1** Calculation of marginal probabilities in Tensor Ring

---

**Input:** A set  $M$  of variable indices, values of these variables  $r_i$  for  $i \in M$

**Output:** Joint probability  $\log p(r_M)$ , where  $r_M = \{r_i \mid i \in M\}$

Initialize  $Q_{\text{buff}} = I \in \mathbb{R}^{m_1 \times m_1}$ ,  $Q_{\text{norm}} = I \in \mathbb{R}^{m_1 \times m_1}$

**for**  $j = 1$  **to**  $d$  **do**

**if**  $j$  is marginalized out ( $j \notin M$ ) **then**

$$Q_{\text{buff}} = Q_{\text{buff}} \cdot \left( \sum_{s_j=0}^{N_j-1} Q_j[s_j] \right)$$

**else**

$$Q_{\text{buff}} = Q_{\text{buff}} \cdot Q_j[r_j]$$

**end if**

$$Q_{\text{norm}} = Q_{\text{norm}} \cdot \left( \sum_{s_j=0}^{N_j-1} Q_j[s_j] \right)$$

**end for**

$$\log p = \log \text{Tr}(Q_{\text{buff}}) - \log \text{Tr}(Q_{\text{norm}})$$

---

optimizer with a learning rate of 0.0001 for 100000 iterations with a batch size 128. We used a schedule of 4 discriminator updates per one generator update. A TRIP prior was 128-dimensional with 10 Gaussians per dimension and core size  $m_k = 40$  (sizes of matrices  $Q_k[s_k]$ ). For a baseline Gaussian Mixture Model (GMM) prior we used  $128 \cdot 10 = 1280$  Gaussians. We conducted all the experiments on Tesla K80.

For VAE models, we used a convolutional encoder and a deconvolutional decoder with a kernel size  $5 \times 5$ , and the number of channels  $[3, 64, 128, 256, 512]$  for the encoder, and a symmetrical architecture for the decoder. We used LeakyReLU for the encoder and ReLU for the decoder. We trained the model for 80,000 weight updates with batch size 128. The latent dimension was 100 for all VAE-based models. For TRIP we used 10 Gaussians per dimension and a Tensor Ring with core size  $m_k = 20$ . For a GMM prior we used 1000 Gaussians.

For conditional generation with TRIP, the architecture was the same as for unconditional generation. For CVAE we parameterized a posterior model  $p_\psi(z \mid y)$  as a fully connected network with layer sizes  $[2, 128, 100]$  and LeakyReLU activations. For the VAE TELBO baseline model [2], we used a fully connected network for  $p_\psi(y \mid z)$  with layer sizes  $[100, 64, 64, 2]$  and LeakyReLU activations.

## 4 Implementation details

Implementing the TRIP module is straight-forward and requires two functions. The first function that we use during training computes  $\log p_\psi(z_M)$  for an arbitrary subset  $M$  of latent dimensions. The second function is used for sampling, and samples from  $p_\psi(z)$  with a chain rule, for which calculations are described in Eq 1.

During training we enforce values of cores  $Q$  to be non-negative by replacing each element of tensors  $Q$  with their absolute values before computation. To make computations more stable, we divide  $Q_{\text{buff}}$  and  $Q_{\text{norm}}$  by the  $\|Q_{\text{buff}}\|$  at each iteration when computing  $\log p_\psi(z)$ .

Table 1: Impact of core size  $m_k$  (CIFAR-10 and CelebA)

| $m_k$ | CIFAR-10     |                |             | CelebA         |                |              |
|-------|--------------|----------------|-------------|----------------|----------------|--------------|
|       | ELBO         | Reconstruction | KL          | ELBO           | Reconstruction | KL           |
| 1     | -89.5        | 60.5           | 29.0        | -243.40        | 177.63         | 65.76        |
| 5     | -89.3        | <b>60.2</b>    | 29.1        | -231.57        | 166.89         | 64.67        |
| 10    | -89.3        | 60.4           | <b>28.9</b> | -223.59        | <b>156.99</b>  | 66.60        |
| 20    | <b>-89.1</b> | <b>60.2</b>    | <b>28.9</b> | <b>-215.62</b> | 158.95         | <b>56.67</b> |

## 5 Impact of core size

In Table 1 we compared the performance of VAE-TRIP model with different core sizes  $m_k$  on CIFAR-10 and CelebA datasets. Note that for  $m_k = 1$ , TRIP is factorized over dimensions, where each dimension is a 1D Gaussian Mixture Model. Notice that models with higher core sizes perform better as the prior becomes more complex. In Table 2 we show computational complexity and memory usage of TRIP model to illustrate a tradeoff between quality and computational complexity of the model.

Table 2: Time and memory consumption of operations with prior (per batch).  $m_k$  is a core size, latent space dimension  $d = 100$ , number of Gaussians per dimension  $N = 10$ , batch size  $b = 128$ . Other parameters are the same as used in the paper. We performed the experiments on Tesla K80. MS stands for milliseconds, MB stands for megabytes. Results averaged over 10 runs; Reported mean  $\pm$  std.

| $m_k$         | LOG-LIKELIHOOD, MS                         | SAMPLING, MS | MEMORY, MB               |
|---------------|--------------------------------------------|--------------|--------------------------|
| $O$ -NOTATION | $O(b \cdot d \cdot (m_k^3 + m_k^2 N + N))$ |              | $O(d \cdot (m_k^2 + N))$ |
| 1             | $126 \pm 7$                                | $201 \pm 21$ | 0.023                    |
| 10            | $137 \pm 4$                                | $232 \pm 13$ | 0.77                     |
| 20            | $193 \pm 15$                               | $312 \pm 18$ | 3.1                      |
| 50            | $200 \pm 20$                               | $360 \pm 17$ | 19.5                     |
| 100           | $308 \pm 12$                               | $882 \pm 15$ | 78.1                     |

Table 3: Condition satisfaction (accuracy) for conditional generative models with different rates of missing attributes in the training set.

| MODEL           | % MISSING   |              |              |
|-----------------|-------------|--------------|--------------|
|                 | 0%          | 90%          | 99%          |
| CVAE [3]        | 86.69       | 85.31        | 84.61        |
| VAE TELBO [2]   | 82.80       | 74.87        | 73.92        |
| JMVAE [4]       | 81.87       | 80.65        | 73.68        |
| VAE-TRIP (OURS) | <b>88.7</b> | <b>87.08</b> | <b>84.89</b> |

### 5.1 Conditional Generation

For the conditional generation, we used images of size  $64 \times 64$ . We study the model performance for different rates of missing attributes (0%, 90%, 99%). For each model, we generated 30,000 images for randomly sampled complete sets of attributes from the test set. We trained a predictive convolutional neural network on a validation set to predict the attributes with 92.3% accuracy and predicted the attributes of generated images. We report the condition matching accuracy—when requested attributes matched the actual attributes. We trained all models except for CVAE [3] directly on data with missing attributes. For CVAE, we imputed missing values with a predictive model. For the missing rate of 90%, the predictive test accuracy was 90%, and for 99%—87%. In the results shown in Table 3, we see that the VAE-TRIP model outperforms other baselines.

Table 4: Preliminary results on combining TRIP and normalizing flows to form a prior; Number of parameters of model components

|                    | $\mathcal{N}(0, 1)$ | GMM     | TRIP   | COMBINATION WITH FLOW |        |               |
|--------------------|---------------------|---------|--------|-----------------------|--------|---------------|
|                    |                     |         |        | $\mathcal{N}(0, I)$   | GMM    | TRIP          |
| PARAMETERS (MODEL) | 11.4M               | 11.1M   | 10.7M  | 11.3M                 | 10.7M  | 10.4M         |
| PARAMETERS (PRIOR) | 0                   | 0.2M    | 0.6M   | 0.3M                  | 0.5M   | 0.7M          |
| PARAMETERS (TOTAL) | 11.4M               | 11.3M   | 11.1M  | 11.5M                 | 11.2M  | 11.1M         |
| ELBO               | -192.6              | -190.05 | -189.1 | -185.3                | -186.0 | <b>-184.7</b> |

## 5.2 Additional experiments for VAE

In Table 4 we compare VAE model with Gaussian, GMM and TRIP priors with a comparable number of parameters. We also provide preliminary results on combining normalizing flows with a TRIP prior.

## References

- [1] Diederik P Kingma and Jimmy Ba. Adam: A Method for Stochastic Optimization. *International Conference on Learning Representations*, 2015.
- [2] Ramakrishna Vedantam, Ian Fischer, Jonathan Huang, and Kevin Murphy. Generative Models of Visually Grounded Imagination. *International Conference on Learning Representations*, 2018.
- [3] Durk P Kingma, Shakir Mohamed, Danilo Jimenez Rezende, and Max Welling. Semi-supervised Learning with Deep Generative Models. In *Advances in neural information processing systems*, pages 3581–3589, 2014.
- [4] Masahiro Suzuki, Kotaro Nakayama, and Yutaka Matsuo. Joint Multimodal Learning with Deep Generative Models. *International Conference on Learning Representations Workshop*, 2017.
